# Supplementary material for: Protein Intake, Metabolic Status and the Gut Microbiota in Different Ethnicities: Results from Two Independent Cohorts
Source: MDPI journal article supplement (doi:10.3390/nu13093159), 2021-09-10
Supplement: s1 [file s1]

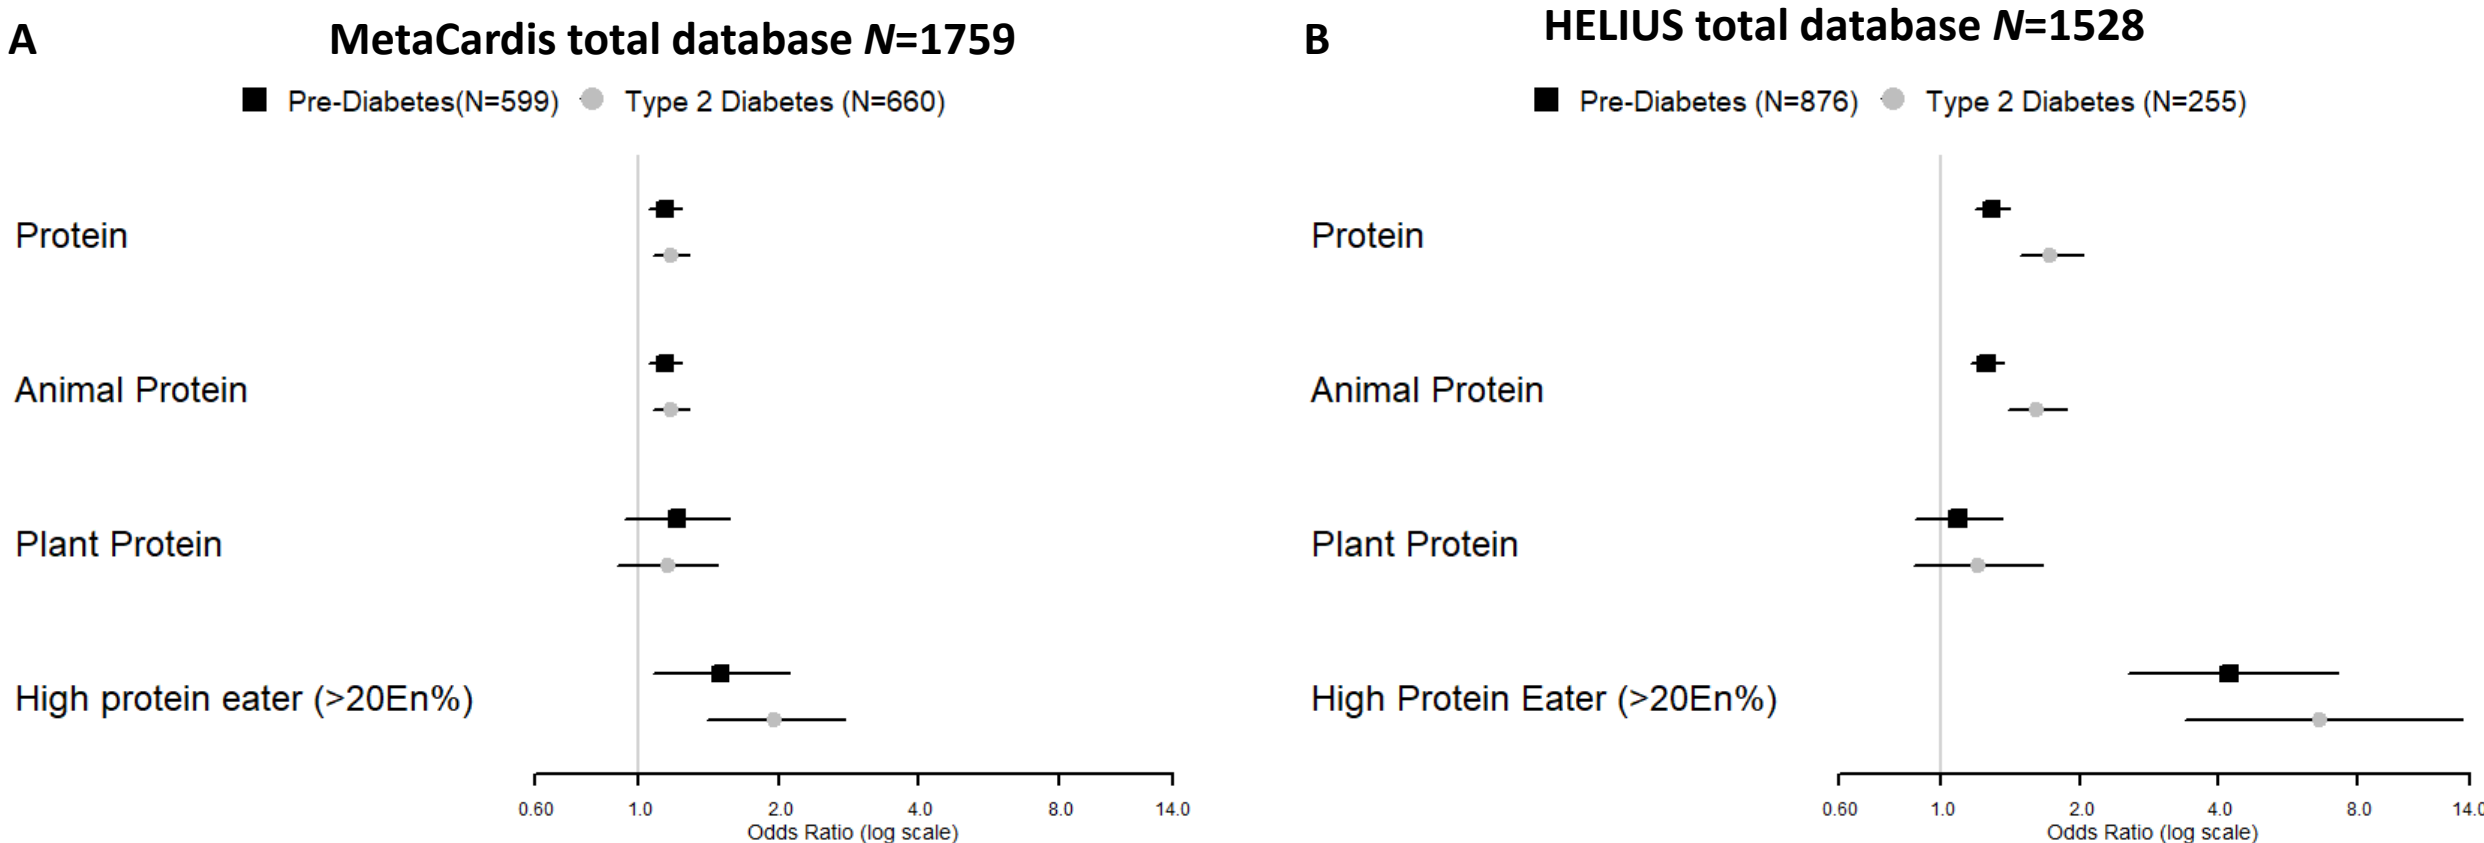

**Supplementary Figure S1.** Forrest plots representing protein intake in the A) MetaCardis and B ) HELIUS cohort. Data is shown per 10gr of protein intake and the model was adjusted for age, gender, physical activity, other macronutrients and total energy intake according to the energy residual model.

Model used:

Metabolic  
status=protein\_residual+carbohydrate\_residual+fat\_residual+fibre\_intake+total\_kcal\_intake+ age  
+gender+physical\_activity
