# Supplementary material for: Protein Intake, Metabolic Status and the Gut Microbiota in Different Ethnicities: Results from Two Independent Cohorts
Source: MDPI journal article supplement (doi:10.3390/nu13093159), 2021-09-10
Supplement: s1 [file s1]

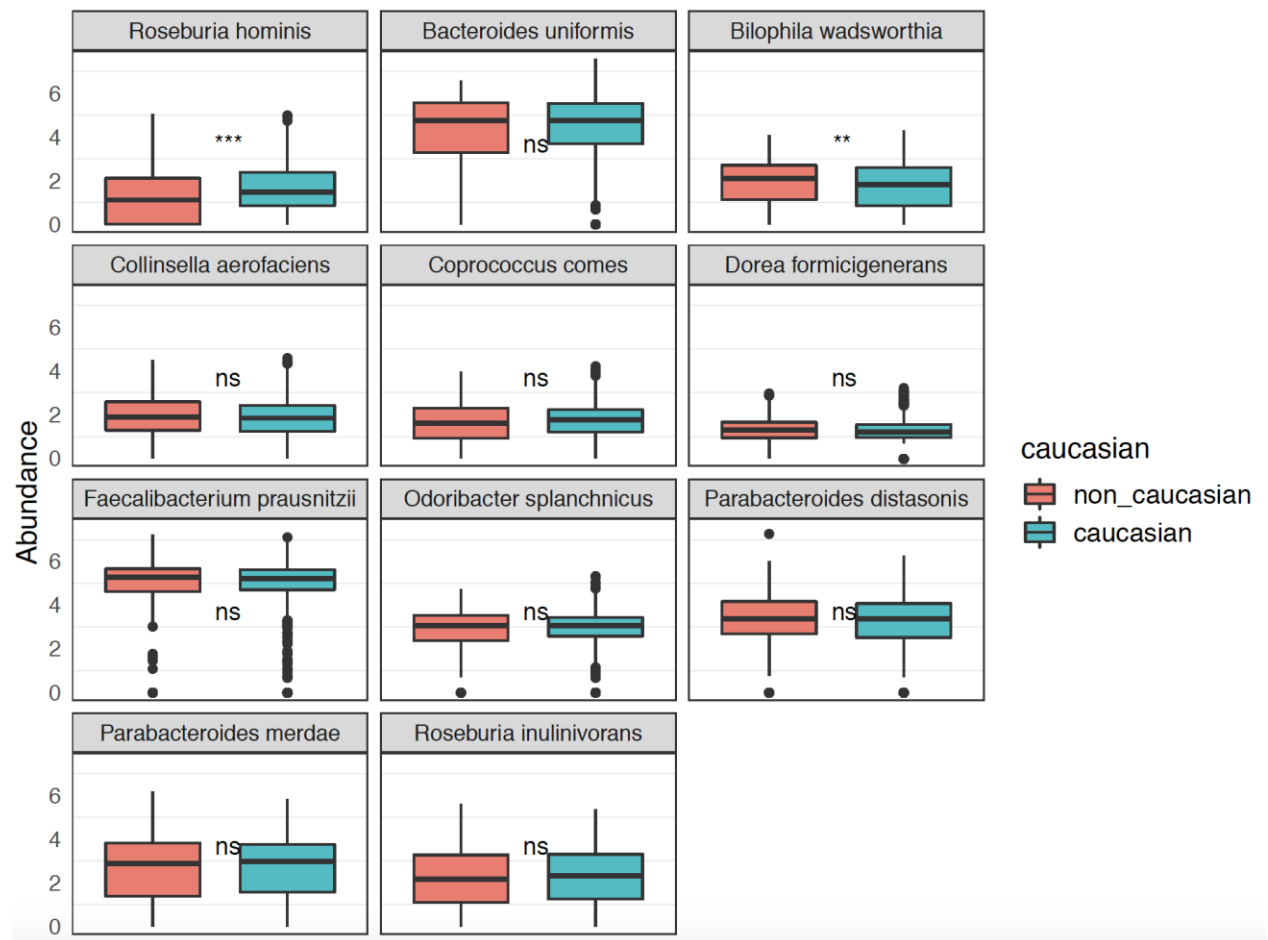

**Supplementary Figure S3.** Animal protein associated taxa and ethnicity in the A) MetaCardis and B ) HELIUS cohort. \*\*\*  $p < 0.001$ , \*\*  $p < 0.01$ ; T. test on log transformed abundance data
