# Supplementary material for: Protein Intake, Metabolic Status and the Gut Microbiota in Different Ethnicities: Results from Two Independent Cohorts
Source: Nutrients. 2021 Sep 10;13(9):3159. doi: 10.3390/nu13093159 (PMC8465773; doi:10.3390/nu13093159)
Supplement: Supplementary file 1 [file nutrients-13-03159-s001.zip]

Archive with 4 entries (4 files):
- supplementary/Supplementary Figure S1. Forrest plots-univariate representing protein intake in the A) MetaCardis and B )HELIUS cohort.pdf
- supplementary/Supplementary Figure S2. Forrest plots-BMI representing protein intake in the A) MetaCardis and B )HELIUS cohort.pdf
- supplementary/Supplementary Figure S3. Animal protein associated taxa and ethnicity in the A) Metacardis and B ) HELIUS cohort.pdf
- supplementary/Supplementary Figure S4. Animal protein associated taxa and T2D in the A) MetaCardis and B)HELIUS.pdf
